# Supplementary material for: Half-dose glucarpidase as efficient rescue for toxic methotrexate levels in patients with acute kidney injury
Source: Springer Nature journal article supplement (doi:10.1007/s00280-021-04361-8), 2021-10-20
Supplement: MOESM1 [file 19776760]

# Supplementary Information

## Half-dose Glucarpidase as Efficient Rescue for Toxic Methotrexate Levels in Patients with Acute Kidney Injury Cancer Chemotherapy and Pharmacology

Dr. Sandra Heuschkel<sup>1</sup>, Dr. Theresa Kretschmann<sup>2</sup>, Dr. Raphael Teipel<sup>2</sup>, Dr. Simone von Bonin<sup>2</sup>, Dr. Stephan Richter<sup>2</sup>, Dr. Susanne Quick<sup>4</sup>, Dr. Nael Alakel<sup>2</sup>, Prof. Christoph Röllig<sup>2</sup>, Dr. Ekaterina Balaian<sup>2</sup>, Prof. Frank Kroschinsky<sup>2</sup>, Dr. Holger Knoth<sup>1</sup>, Prof. Martin Bornhäuser<sup>2</sup>, Dr. Malte von Bonin<sup>2,3,#</sup>

<sup>1</sup> Klinik-Apotheke, Universitätsklinikum Carl Gustav Carus, Technische Universität Dresden (TUD), Fetscherstrasse 74, 01307 Dresden, Germany

<sup>2</sup> Medizinische Klinik und Poliklinik 1, Universitätsklinikum Carl Gustav Carus, Technische Universität Dresden (TUD), Fetscherstrasse 74, 01307 Dresden, Germany

<sup>3</sup> German Cancer Consortium (DKTK), partner site Dresden, Dresden, Germany, and German Cancer Research Center (DKFZ), Heidelberg, Germany

<sup>4</sup> Medizinische Klinik und Poliklinik 3, Universitätsklinikum Carl Gustav Carus, Technische Universität Dresden (TUD), Fetscherstrasse 74, 01307 Dresden, Germany

# Corresponding author: Dr. Malte von Bonin, ORCID ID 0000-0002-2995-3230

Supplemental Table 1: Folinic Acid Rescue in HDMTX ( $\geq 0.1 \text{ g/m}^2$  to  $\leq 4 \text{ g/m}^2$  and  $\leq 4$  hours infusion time), warning signs and indicators for glucarpidase treatment

| Time from start of MTX infusion [h] | Blood sampling (MTX level, creatinine) | Folinic acid administration | MTX level [ $\mu\text{mol/L}$ ]                                | Folinic acid dose <sup>#</sup>                                                              | Warning signs for potentially protracted MTX clearance                   | Strong indicators for treatment with glucarpidase (modified from [8])   |
|-------------------------------------|----------------------------------------|-----------------------------|----------------------------------------------------------------|---------------------------------------------------------------------------------------------|--------------------------------------------------------------------------|-------------------------------------------------------------------------|
| 24                                  | X                                      | X                           |                                                                | 15 mg/m <sup>2</sup>                                                                        | MTX > 10 $\mu\text{mol/L}$ or increase in creatinine >25% from baseline  | MTX > 30 $\mu\text{mol/L}$ $\pm$ creatinine > 25% from baseline         |
| 30                                  |                                        | X                           | <10<br>>10                                                     | 15 mg/m <sup>2</sup><br>100 mg/m <sup>2</sup>                                               |                                                                          | MTX > 10 $\mu\text{mol/L}$ or increase in creatinine >50% from baseline |
| 36                                  |                                        | X                           |                                                                |                                                                                             |                                                                          |                                                                         |
| 42                                  | X                                      | X                           |                                                                |                                                                                             |                                                                          | MTX > 10 $\mu\text{mol/L}$ $\pm$ creatinine > 50% from baseline         |
| 48                                  | X                                      | X                           | <0.1<br>$\geq 0.1$ to <1.0<br>$\geq 1.0$ to $\leq 5.0$<br>>5.0 | Stop rescue<br>15 mg/m <sup>2</sup><br>100 mg/m <sup>2</sup><br>MTX level x bodyweight [kg] | MTX > 1 $\mu\text{mol/L}$ or increase in creatinine >50% from baseline   | MTX > 5 $\mu\text{mol/L}$ $\pm$ creatinine > 50% from baseline          |
| 54                                  |                                        | X                           |                                                                |                                                                                             |                                                                          |                                                                         |
| 60                                  |                                        | X                           |                                                                |                                                                                             |                                                                          |                                                                         |
| 66                                  |                                        | X                           |                                                                |                                                                                             |                                                                          |                                                                         |
| 72                                  | X                                      | X                           |                                                                |                                                                                             |                                                                          |                                                                         |
| 78                                  |                                        | X                           | <0.1<br>$\geq 0.1$ to <0.4<br>$\geq 0.4$ to $\leq 5.0$<br>>5.0 | Stop rescue<br>15 mg/m <sup>2</sup><br>100 mg/m <sup>2</sup><br>MTX level x bodyweight [kg] | MTX > 0.1 $\mu\text{mol/L}$ or increase in creatinine >50% from baseline |                                                                         |
| 84                                  |                                        | X                           |                                                                |                                                                                             |                                                                          |                                                                         |
| 90                                  |                                        | X                           |                                                                |                                                                                             |                                                                          |                                                                         |
| 96                                  | X                                      | X                           |                                                                |                                                                                             |                                                                          |                                                                         |
| 102                                 |                                        | X                           |                                                                |                                                                                             |                                                                          |                                                                         |
| 108                                 |                                        | X                           |                                                                |                                                                                             |                                                                          |                                                                         |

Continue blood sampling (MTX level and serum creatinine once a day) and folinic acid rescue every 6 hours as per time point t = 96 h until MTX <0.1  $\mu\text{mol/L}$

<sup>#</sup> In the event of glucarpidase treatment, the dose of folinic acid should be reduced to 100 mg/m<sup>2</sup> after glucarpidase injection as LC/MS results are not available for dose calculation at short notice.

Supplemental Table 2: Folinic Acid Rescue in HDMTX ( $\geq 0.5 \text{ g/m}^2$  to  $\leq 1.5 \text{ g/m}^2$  and 24 hours infusion time)<sup>a</sup>, warning signs and indicators for glucarpidase treatment

| Time from start of MTX infusion [h] | Blood sampling: MTX level | Blood sampling: creatinine | MTX level [ $\mu\text{mol/L}$ ] | Folinic acid dose #                   | Warning signs for potentially protracted MTX clearance                      | Strong indicators for treatment with glucarpidase (modified from [8]) |
|-------------------------------------|---------------------------|----------------------------|---------------------------------|---------------------------------------|-----------------------------------------------------------------------------|-----------------------------------------------------------------------|
| 24                                  | X                         | X                          | <150                            | -                                     | MTX $\geq 150 \mu\text{mol/L}$ or increase in creatinine >25% from baseline |                                                                       |
|                                     |                           |                            | $\geq 150$                      | -                                     |                                                                             |                                                                       |
| 36                                  | X                         |                            | <3                              | 0 $\text{mg/m}^2$                     | MTX $\geq 3 \mu\text{mol/L}$                                                | MTX > 30 $\mu\text{mol/L}$ $\pm$ creatinine > 50% from baseline       |
|                                     |                           |                            | $\geq 3$                        | 30 $\text{mg/m}^2$                    |                                                                             |                                                                       |
| 42                                  | X                         |                            | <1                              | 30 $\text{mg/m}^2$                    | MTX $\geq 2 \mu\text{mol/L}$                                                | MTX > 10 $\mu\text{mol/L}$ $\pm$ creatinine > 50% from baseline       |
|                                     |                           |                            | $\geq 1$ to <2                  | 30 $\text{mg/m}^2$                    |                                                                             |                                                                       |
|                                     |                           |                            | $\geq 2$ to <3                  | 45 $\text{mg/m}^2$                    |                                                                             |                                                                       |
|                                     |                           |                            | $\geq 3$ to <4                  | 60 $\text{mg/m}^2$                    |                                                                             |                                                                       |
|                                     |                           |                            | $\geq 4$ to <5                  | 75 $\text{mg/m}^2$                    |                                                                             |                                                                       |
| 48                                  | X                         | X                          | <0.4                            | 15 $\text{mg/m}^2$                    | MTX $\geq 1 \mu\text{mol/L}$ or increase in creatinine >25% from baseline   | MTX > 5 $\mu\text{mol/L}$ $\pm$ creatinine > 50% from baseline        |
|                                     |                           |                            | $\geq 0.4$ to <1                | 15 $\text{mg/m}^2$                    |                                                                             |                                                                       |
|                                     |                           |                            | $\geq 1$ to <2                  | 30 $\text{mg/m}^2$                    |                                                                             |                                                                       |
|                                     |                           |                            | $\geq 2$ to <3                  | 45 $\text{mg/m}^2$                    |                                                                             |                                                                       |
|                                     |                           |                            | $\geq 3$ to <4                  | 60 $\text{mg/m}^2$                    |                                                                             |                                                                       |
|                                     |                           |                            | $\geq 4$ to <5                  | 75 $\text{mg/m}^2$                    |                                                                             |                                                                       |
| 54                                  | X                         |                            | <0.25                           | 15 $\text{mg/m}^2$ , then stop rescue | MTX $\geq 0.25 \mu\text{mol/L}$                                             |                                                                       |
|                                     |                           |                            | $\geq 0.25$ to <1               | 15 $\text{mg/m}^2$                    |                                                                             |                                                                       |
|                                     |                           |                            | $\geq 1$ to <2                  | 30 $\text{mg/m}^2$                    |                                                                             |                                                                       |
|                                     |                           |                            | $\geq 2$ to <3                  | 45 $\text{mg/m}^2$                    |                                                                             |                                                                       |
|                                     |                           |                            | $\geq 3$ to <4                  | 60 $\text{mg/m}^2$                    |                                                                             |                                                                       |
|                                     |                           |                            | $\geq 4$ to <5                  | 75 $\text{mg/m}^2$                    |                                                                             |                                                                       |
|                                     |                           |                            | $\geq 5$                        | MTX level x bodyweight [kg]           |                                                                             |                                                                       |

Continue blood sampling (MTX level every 6 hours, serum creatinine once a day) and folinic acid rescue every 6 hours as per time point t=54 h until MTX <0.25  $\mu\text{mol/L}$

# In the event of glucarpidase treatment, the dose of folinic acid should be reduced to 100  $\text{mg/m}^2$  after glucarpidase injection as LC/MS results are not available for dose calculation at short notice.

<sup>a</sup> GMALL 08/2013 trial (EudraCT 2013-003466-13)
